# Supplementary material for: Parkin‐mediated ubiquitylation redistributes MITOL/March5 from mitochondria to peroxisomes
Source: PubMed Central journal article supplement (PMC6893362; doi:10.15252/embr.201947728), 2019-10-10
Supplement: EMBR-20-e47728-s001.pdf [file EMBR-20-e47728-s001.pdf]

## Table of Contents

|                    |   |
|--------------------|---|
| Appendix Figure S1 | 2 |
| Appendix Figure S2 | 3 |
| Appendix Figure S3 | 4 |
| Appendix Figure S4 | 5 |
| Appendix Figure S5 | 6 |
| Appendix Figure S6 | 7 |

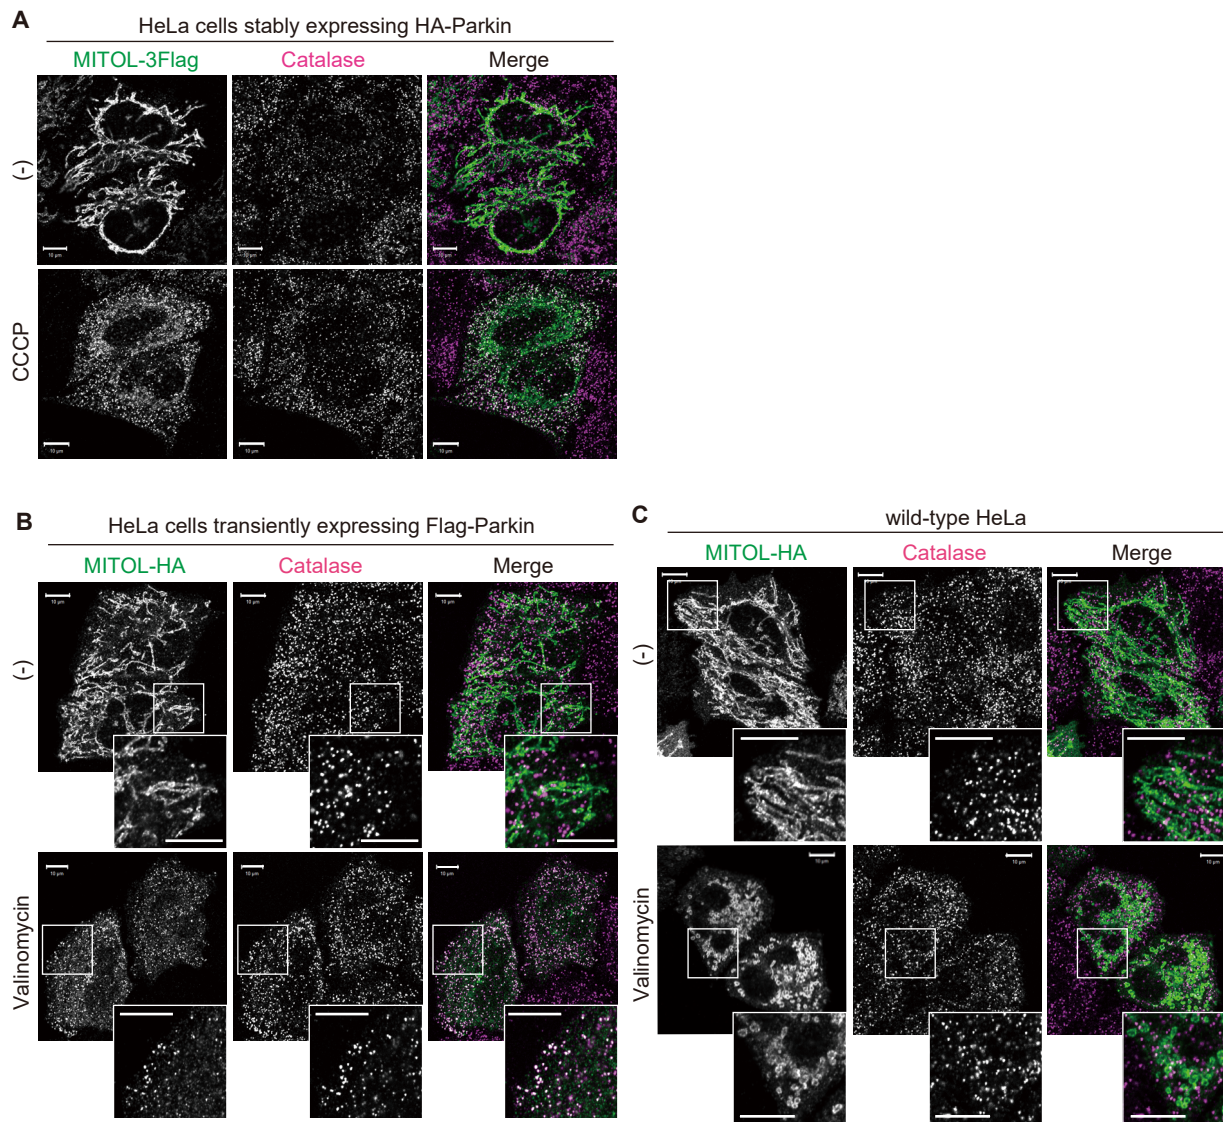

### Appendix Figure S1.

Valinomycin also caused redistribution of MITOL from mitochondria to peroxisomes in a Parkin-dependent manner.

(A) Peroxisomal localization of MITOL after CCCP treatment was unaffected by a C-terminal 3Flag-tag. HeLa cells stably expressing HA-Parkin were transfected with MITOL-3Flag, treated with 15  $\mu$ M CCCP for 3 hours, and then subjected to immunocytochemistry with anti-Flag and anti-catalase antibodies. Higher magnification images of the boxed regions are shown in the small panel.

Scale bars, 10  $\mu$ m.

(B, C) Valinomycin treatment also triggered co-localization of MITOL and catalase. HeLa cells transiently expressing Flag-Parkin (B) or wild-type HeLa cells (C) were transfected with MITOL-HA, treated with 15  $\mu$ M valinomycin for 3 hours, and then subjected to immunocytochemistry with anti-HA and anti-catalase antibodies. Higher magnification images of the boxed regions are shown in the small panel. Scale bars, 10  $\mu$ m.



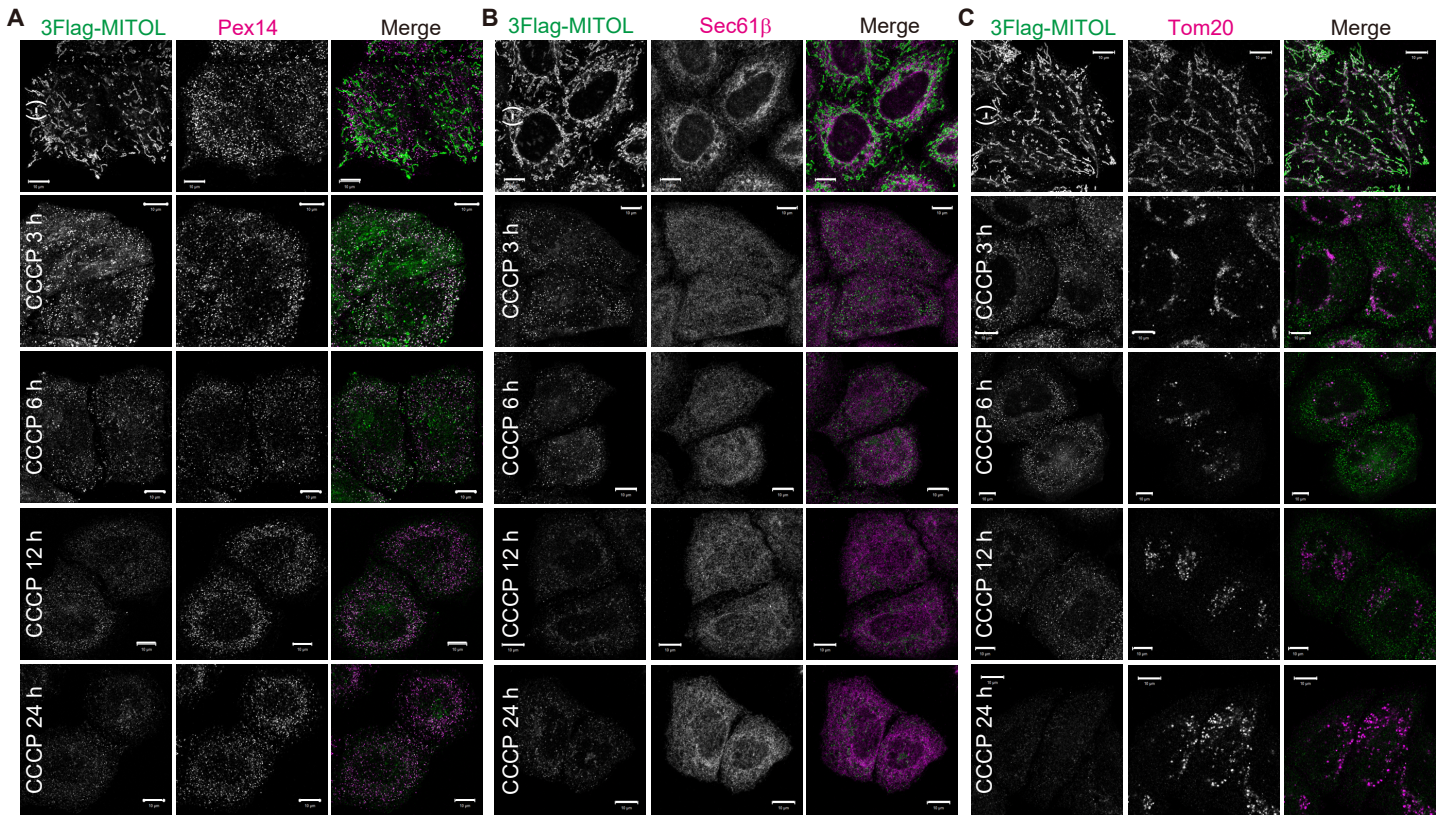

**Appendix Figure S2.**

Following extended CCCP treatment, MITOL co-localizes with Pex14 but not with Sec61β or Tom20.

(A - C) HeLa cells stably expressing HA-Parkin and 3Flag-MITOL were treated with 15  $\mu$ M CCCP for the indicated times and then subjected to immunocytochemistry using anti-Flag, anti-Pex14, anti-Sec61 $\beta$ , and anti-Tom20 antibodies. Scale bars, 10  $\mu$ m.

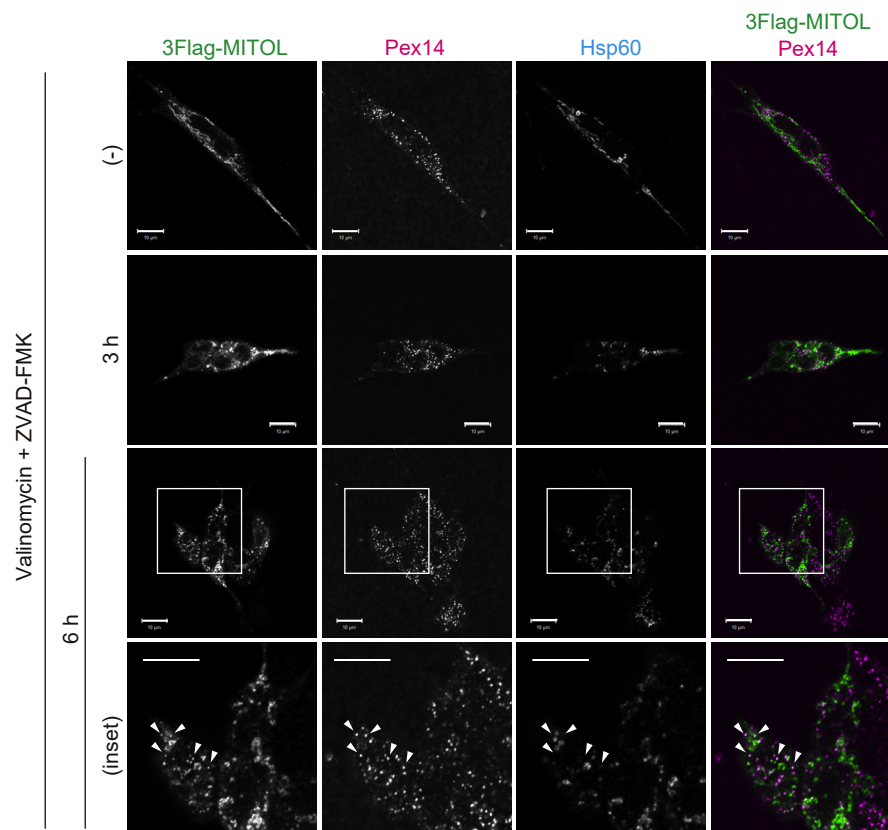

**Appendix Figure S3.**

Endogenous levels of Parkin are able to cause the transition of MITOL from damaged mitochondria to peroxisomes.

SH-SY5Y cells with endogenous Parkin and transiently expressing 3Flag-MITOL were treated with 10  $\mu$ M valinomycin + 10  $\mu$ M ZVAD-FMK for 3 or 6 hours, then analyzed by immunofluorescence using anti-Flag, anti-Pex14, and anti-Hsp60 antibodies.

Arrowheads indicate co-localization of 3Flag-MITOL and Pex14. Scale bars, 10  $\mu$ m.

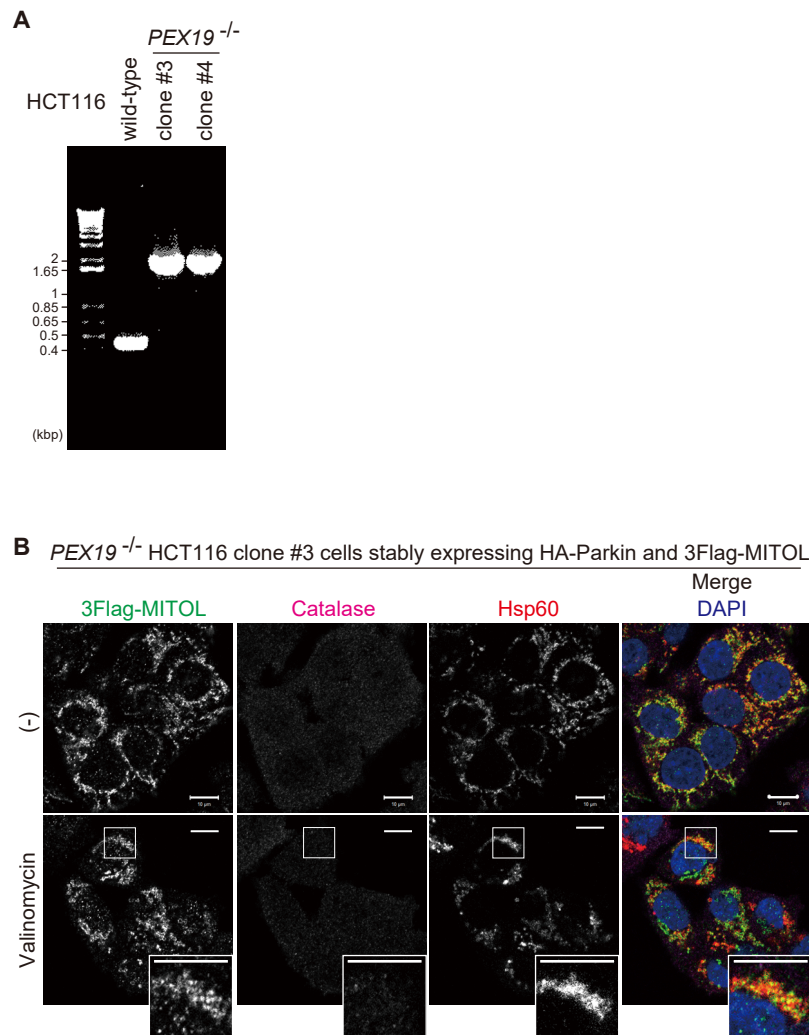

**Appendix Figure S4.**

Mitochondrial retention of MITOL in multiple *PEX19*<sup>-/-</sup> clonal cell lines after mitophagy stimulation.

(A) *PEX19*<sup>-/-</sup> single clones were screened by genomic DNA-based PCR to verify neomycin-resistant and hygromycin-resistant gene insertion.

(B) MITOL was retained on mitochondria in different *PEX19*<sup>-/-</sup> HCT116 clonal cells. *PEX19*<sup>-/-</sup> cells (clone #3) stably expressing HA-Parkin and 3Flag-MITOL were treated with 10  $\mu$ M valinomycin for 3 hours, and subjected to immunocytochemistry with anti-Flag, anti-catalase and anti-Hsp60 antibodies. Higher magnification images of the boxed regions are shown in the small panel. Scale bars, 10  $\mu$ m.

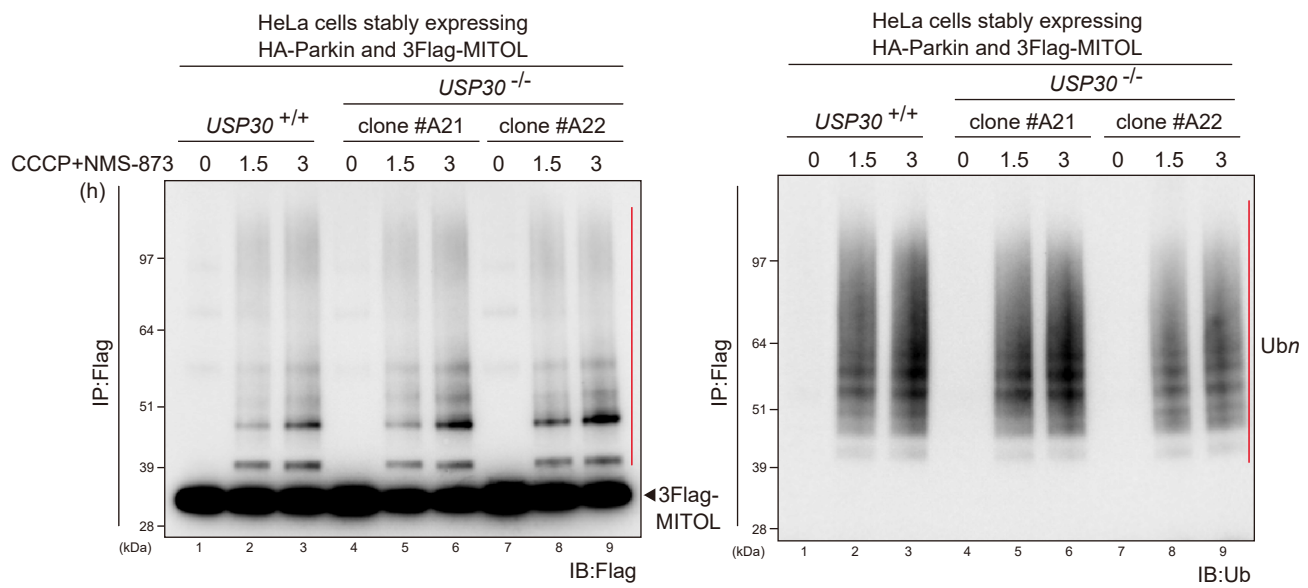**Appendix Figure S5.**

The ubiquitylation state of MITOL in *USP30*<sup>+/+</sup> cells following CCCP treatment is identical to that in *USP30* knockout cells. Wild-type or *USP30* knockout HeLa cells stably expressing HA-Parkin and 3Flag-MITOL were treated with 15  $\mu$ M CCCP and 10  $\mu$ M NMS-873 for the indicated times. After immunoprecipitation with anti-Flag magnetic beads, the samples were immunoblotted using anti-Flag and anti-ubiquitin antibodies. Red bars indicate the ubiquitylation signal.



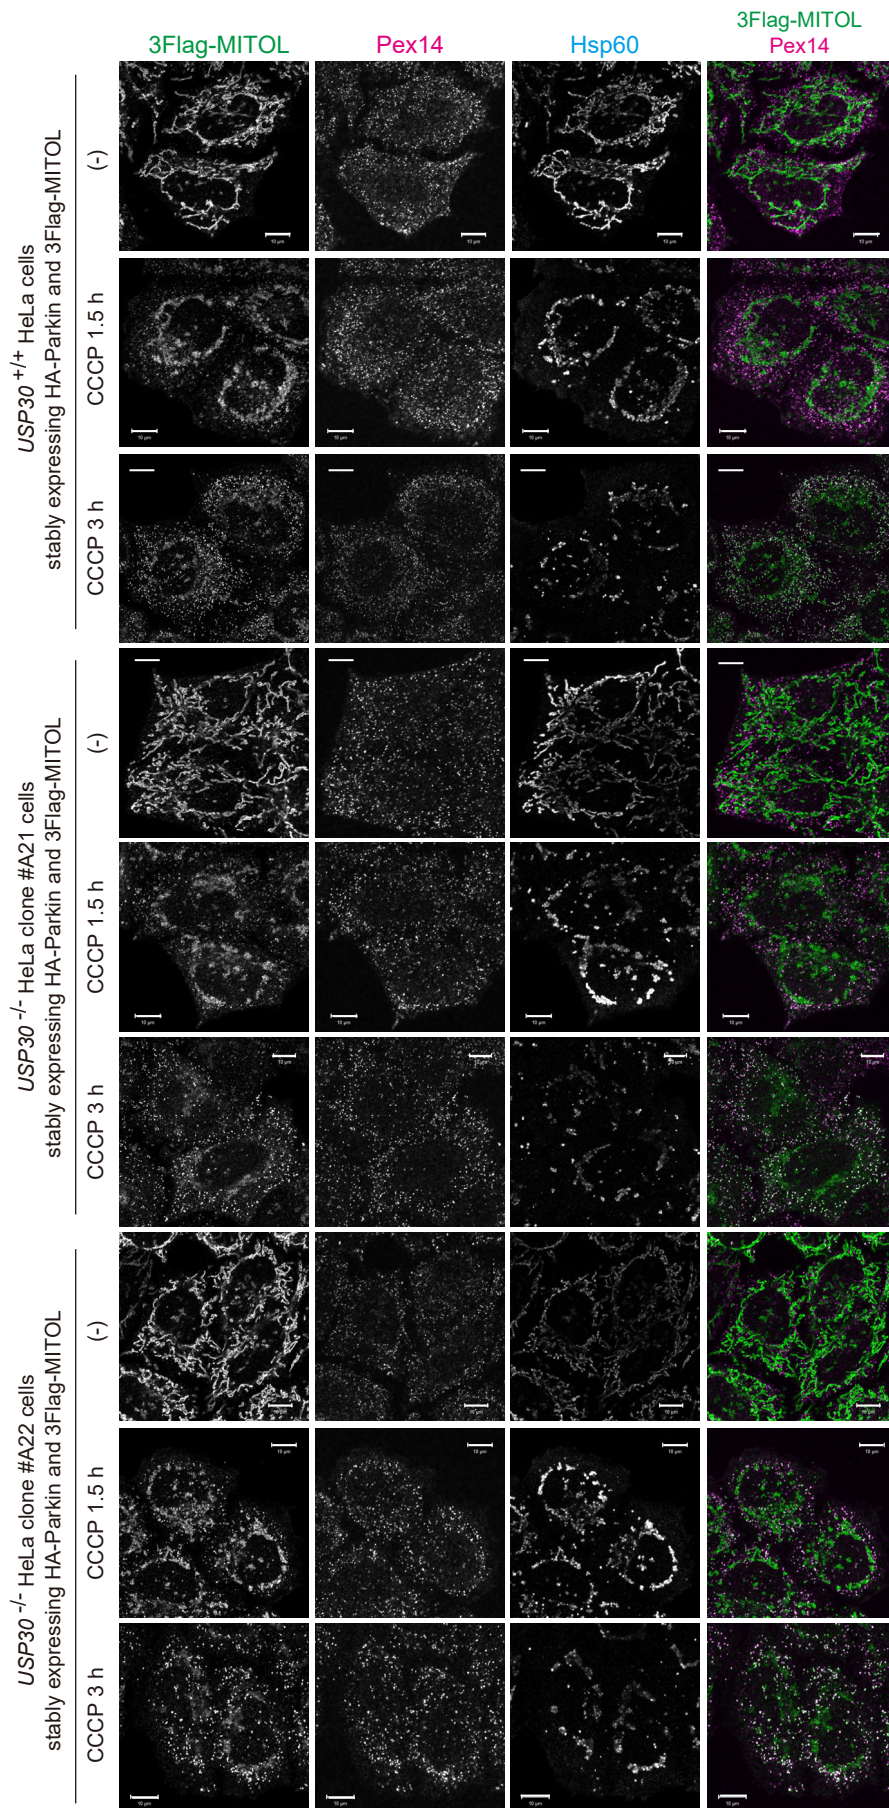**Appendix Figure S6.**

*USP30* is dispensable for the redistribution of MITOL to peroxisomes.

Wild-type or *USP30* knockout HeLa cells stably expressing HA-Parkin and 3Flag-MITOL were treated with 15 μM CCCP for the indicated times. Cells were immunostained using anti-Flag, anti-Pex14, and anti-Hsp60 antibodies. Scale bars, 10 μm.
